# Supplementary material
Source: publisher site journal article supplement (https://www.spandidos-publications.com/273/downloadSupplementary)

Figure S1. Cytotoxic effects of protein hydrolysate from *A. ebracteatus* on cancer cell lines using MTT. Vero represents normal cell, SW620 is a colon cancer cell (ATCC® CCL-227™), HepG2 is a liver cancer cell (ATCC® HB-8065™) and A431 is a skin cancer cell (ATCC® CRL-1555™). The data were presented from two independent experiments with 8 replicates. \* and # indicate the mean difference is significant at the 0.05 level for comparison with Vero and between cell within the same concentration, respectively (Dunnett's T3 analysis).

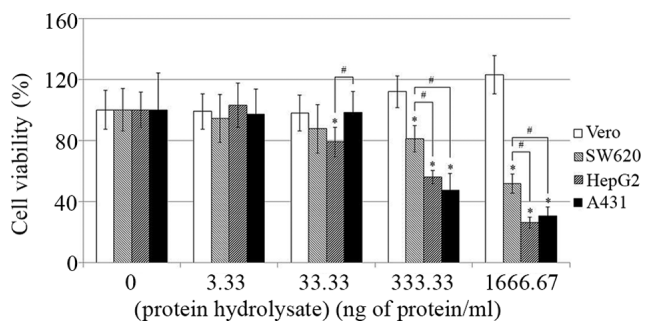

Supplement: Supplementary file 1 [file downloadSupplementary]
